# Supplementary material for: A method to capture the large relativistic and solvent effects on the UV-vis spectra of photo-activated metal complexes
Source: Royal Society of Chemistry journal article supplement (doi:10.1039/d2cp04937f), 2023-01-01
Supplement: d2cp04937f1.pdf [file d2cp04937f1.pdf]

**Supporting information: A method to capture the large relativistic and solvent effects on UV-vis spectra of photo-activated metal complexes**

Joel Creutzberg<sup>1, a)</sup> and Erik Donovan Hedegård<sup>1,2, b)</sup>

<sup>1)</sup>*Division of Theoretical Chemistry, Lund University, Lund, Sweden*

<sup>2)</sup>*Department of Physics, Chemistry and Pharmacy, Campusvej 55, 5230 Odense, Denmark*

(Dated: 10 January 2023)

---

<sup>a)</sup>Electronic mail: joel.creutzberg@teokem.lu.se

<sup>b)</sup>Electronic mail: erdh@sdu.dk

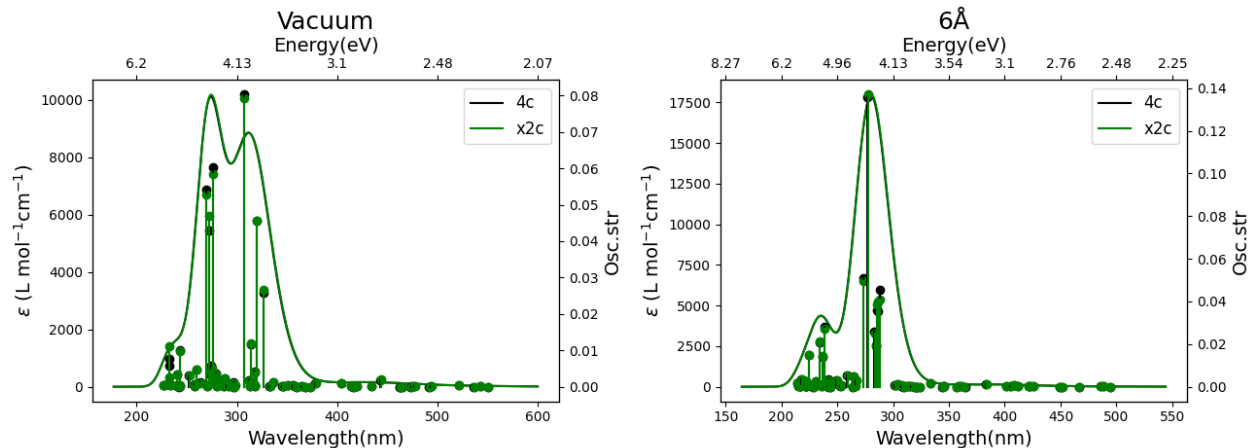

(a)

(b)

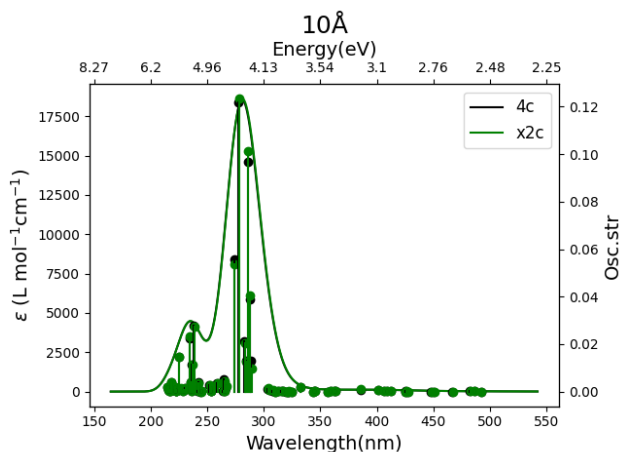

(c)

Figure S1: UV-vis spectra calculated using TDDFT with the CAM-B3LYP functional comparing X2C with 4C for (a) Complex in vacuum taken from structure optimized with BP86 (b) Complex solvated in a 6 Å sphere of water molecules (optimized with BP86) (c) Complex solvated in a 10 Å sphere of water molecules (optimized with BP86).

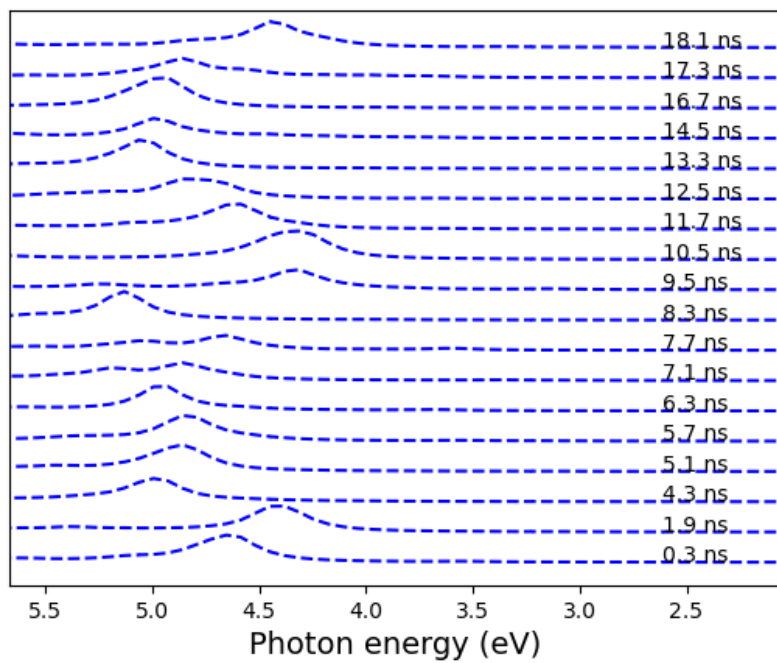

Figure S2: Spectra calculated for various snapshots from md simulation. Peak positions are reported in Table S1

| Snapshot | Peak energy (eV) | $\sigma(\omega)$ [a.u.] |
|----------|------------------|-------------------------|
| 0.3 ns   | 4.653            | 2.586                   |
| 1.3 ns   | 4.517            | 3.256                   |
| 1.7 ns   | 4.517            | 2.363                   |
| 1.9 ns   | 4.381            | 2.458                   |
| 2.9 ns   | 4.857            | 2.425                   |
| 3.9 ns   | 4.313            | 2.099                   |
| 4.3 ns   | 4.993            | 2.21                    |
| 4.5 ns   | 4.993            | 2.911                   |
| 4.9 ns   | 4.585            | 1.347                   |
| 5.1 ns   | 4.857            | 2.531                   |
| 5.3 ns   | 4.789            | 1.537                   |
| 5.7 ns   | 4.857            | 2.437                   |
| 5.9 ns   | 4.653            | 3.079                   |
| 6.1 ns   | 4.993            | 2.571                   |
| 6.3 ns   | 4.925            | 2.319                   |
| 6.5 ns   | 4.789            | 1.857                   |
| 6.7 ns   | 4.993            | 2.527                   |
| 7.1 ns   | 4.857            | 1.689                   |
| 7.3 ns   | 4.993            | 1.357                   |
| 7.5 ns   | 4.789            | 2.182                   |
| 7.7 ns   | 4.653            | 1.414                   |
| 7.9 ns   | 4.653            | 1.732                   |
| 8.1 ns   | 4.517            | 2.533                   |
| 8.3 ns   | 5.129            | 2.716                   |
| 8.7 ns   | 5.061            | 2.84                    |
| 9.5 ns   | 4.313            | 1.908                   |
| 10.3 ns  | 4.993            | 2.412                   |
| 10.5 ns  | 4.313            | 2.704                   |
| 10.9 ns  | 5.129            | 3.029                   |
| 11.3 ns  | 4.653            | 1.403                   |
| 11.7 ns  | 4.585            | 2.383                   |
| 11.9 ns  | 5.129            | 2.839                   |
| 12.1 ns  | 4.857            | 2.786                   |
| 12.5 ns  | 4.857            | 1.894                   |
| 12.9 ns  | 5.061            | 1.287                   |
| 13.1 ns  | 5.061            | 2.64                    |
| 13.3 ns  | 5.061            | 2.725                   |
| 13.5 ns  | 4.789            | 2.131                   |
| 14.5 ns  | 4.993            | 1.903                   |
| 15.1 ns  | 4.857            | 2.215                   |
| 16.1 ns  | 4.653            | 2.879                   |
| 16.7 ns  | 4.925            | 2.874                   |
| 16.9 ns  | 4.789            | 2.952                   |
| 17.1 ns  | 4.381            | 2.6                     |
| 17.3 ns  | 4.857            | 1.846                   |
| 17.7 ns  | 4.789            | 2.775                   |
| 17.9 ns  | 4.857            | 2.902                   |
| 18.1 ns  | 4.449            | 2.458                   |
| 18.3 ns  | 5.061            | 1.615                   |

Table S1: Data for the peaks of all md snapshots

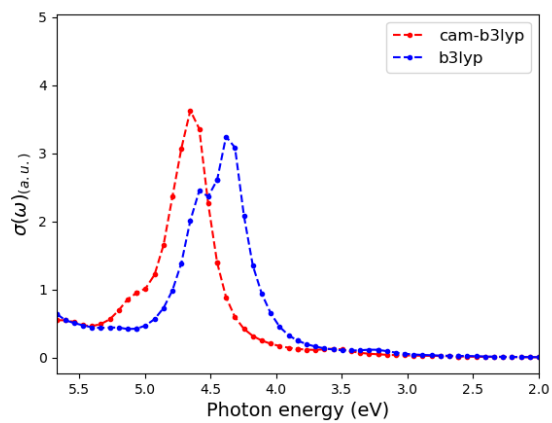

(a)

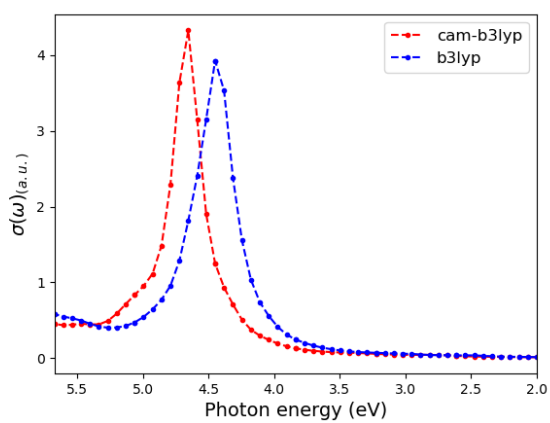

(b)

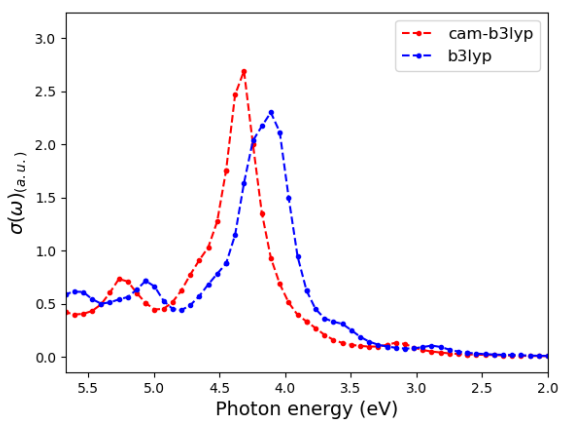

(c)

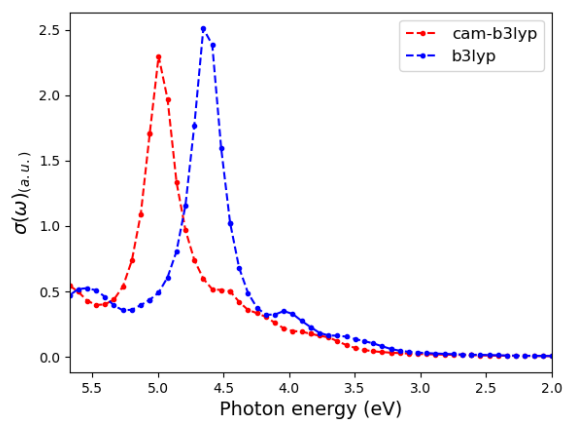

(d)

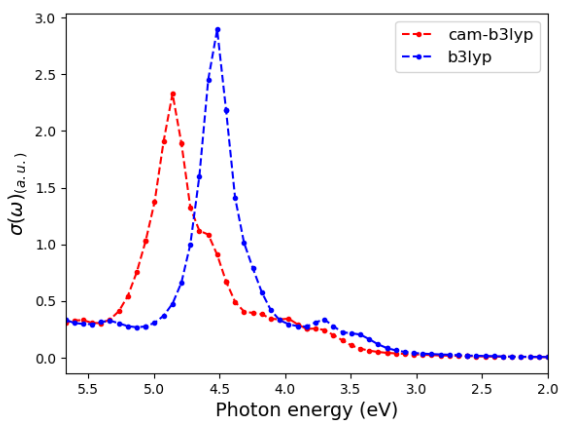

(e)

Figure S4 Comparison of B3LYP and CAM-B3LYP for 5 structures

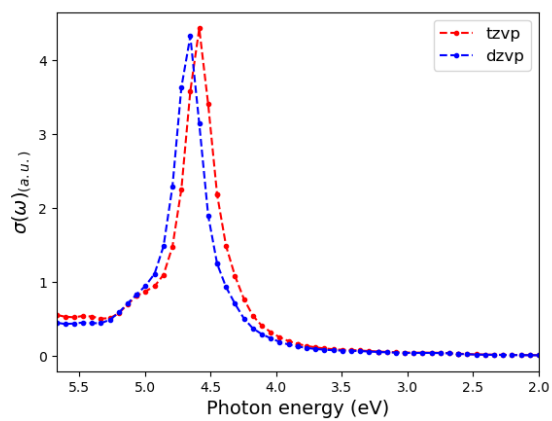

(a)

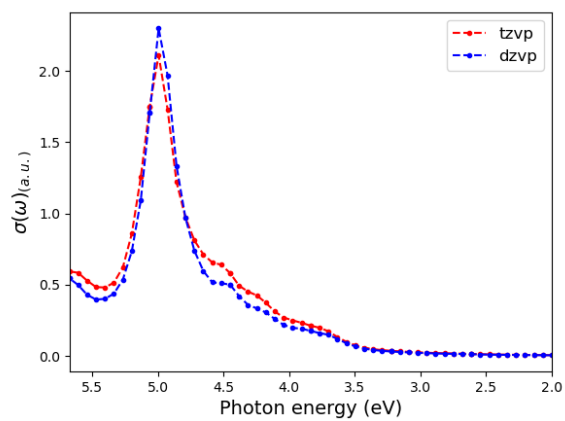

(b)

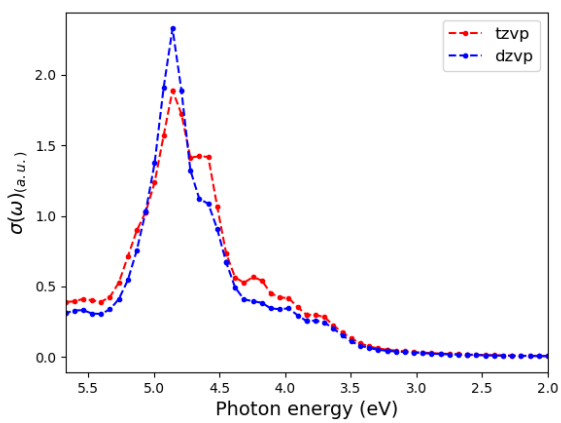

(c)

Figure S5 Comparison of spectra obtained with DZVP (def2-sv(p) for ligands and dyall.v2z for Pt) and TZVP (def2-tzvp for the ligands and dyall.v3z for Pt) using CAM-B3LYP for 3 structures.

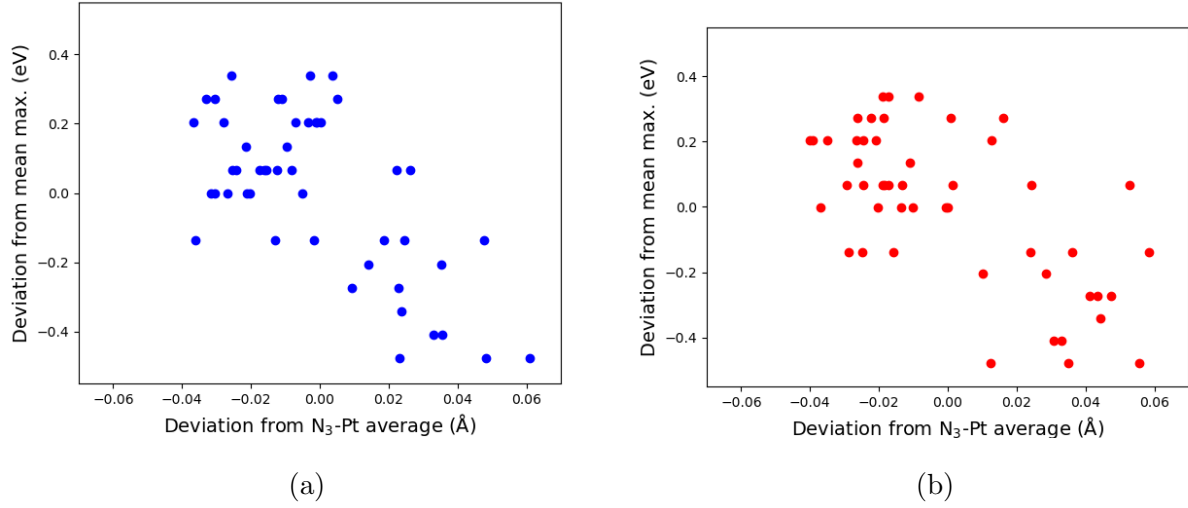

Figure S6 The figures show the deviation from the average peak displayed against the deviation from the average bond length with respect to the two N<sub>3</sub>-Pt bond distances.

| Snapshots | Peak (eV)       | $\sigma(\omega)$ [ <i>a.u.</i> ] | Snapshots | Peak (eV)       | $\sigma(\omega)$ [ <i>a.u.</i> ] |
|-----------|-----------------|----------------------------------|-----------|-----------------|----------------------------------|
| 1–10      | $4.67 \pm 0.23$ | $2.42 \pm 0.48$                  | 1–10      | $4.67 \pm 0.23$ | $2.42 \pm 0.48$                  |
| 11–20     | $4.87 \pm 0.11$ | $2.15 \pm 0.54$                  | 1–20      | $4.76 \pm 0.21$ | $2.29 \pm 0.52$                  |
| 21–30     | $4.76 \pm 0.27$ | $2.22 \pm 0.47$                  | 1–30      | $4.76 \pm 0.23$ | $2.27 \pm 0.51$                  |
| 31–40     | $4.87 \pm 0.26$ | $2.37 \pm 0.59$                  | 1–40      | $4.79 \pm 0.24$ | $2.30 \pm 0.53$                  |
| 41–49     | $4.78 \pm 0.17$ | $2.46 \pm 0.42$                  | 1–49      | $4.79 \pm 0.23$ | $2.33 \pm 0.52$                  |

TABLE S2: Averages and deviations for excitation energies and absorption cross sections (either blocks of 10 snapshots or cumulative).
